# Supplementary material
Source: publisher figshare collection journal article supplement (https://brill.figshare.com/ndownloader/files/31054645)
Supplement: Supplementary file 1 [file 31054645]

| Esteban et al. (2004) | Features / Fossil species | *Cedroxylon shaktnaense* comb. nov. | 3. *Abies* sect. *Amabilis* (Matzenko) Farjon & Rushforth _ Type: *Abies amabilis* Dougl. ex  Forbes |
| --- | --- | --- | --- |
| AT1 | Well‐defined growth  rings | + | + |
| AT4 | Axial tracheids of polygonal section | + | + |
| AT6 | Intercellular spaces  present | + | ‐ |
| AT8 | Spiral thickenings present, but not in all the  axial tracheids | ‐ | ‐ |
| AT9 | Bordered pits present on the tangential walls of  the axial tracheids | + | + |
| AT10 | Uniseriate bordered pits on the radial walls of  the axial tracheids | + | + |
| AT11 | Biseriate bordered pits on the radial walls  of the axial tracheids | (occasionally) | + |
| AT19 | Bars of Sanio | (occasionally) | + |
| AT20 | Trabecula | ‐ | ‐ |
| AT21 | Crystals present in  axial tracheids | ‐ | ‐ |
| P1 | Axial parenchyma absent  or scarce | + | + |
| P2 | Axial parenchyma with smooth transverse walls | + | ‐ |
| P3 | Axial parenchyma with nodular transverse  walls | + | ‐ |
| P4 | Axial parenchyma with  crystals | ‐ | ‐ |
| P5 | Axial parenchyma with  resin | ‐ | ‐ |
| P6 | Diffuse axial  parenchyma present | + | ‐ |
| P8 | Terminal axial  parenchyma present | + / ‐ | ‐ |
| R1 | Uniseriate rays | + | + |
| R2 | Partially biseriate rays | (in less than 10% of the total number of the  rays) | ‐ |
| R4 | Ray height from 1 to 15  cells | + | + |
| R5 | Ray height from 16 to 30 cells | ‐ | ‐ |
| R7 | Number of rays per  mm2 <70 | + | ‐ |
| R9 | Number of rays per  mm2 >70 | ‐ | + |
| R17 | Ray parenchyma with  nodular axial walls | + | + |
| R19 | Ray parenchyma with  pitted horizontal walls | + | + |
| R20 | Ray parenchyma with  crystals | ‐ | + |
| R23 | Piceoid cross field pits | + | ‐ |
| R24 | Cupressoid cross field  pits | ‐ | ‐ |
| R25 | Taxodioid cross field pits | + | + |
| R26 | 1 to 2 pits per cross  field | + | + |
| R27 | 3 to 4 pits per cross  field | + | ‐ |
| RC1 | Resin canals absent | + | + |
| RC3 | Thick‐walled epithelial cell resin canals | + | ‐ |
| RC4 | Number of epithelial cells in the axial resin  canals <9 | + | ‐ |
| RC5 | Number of epithelial cells in the axial resin  canals > 9 | + | ‐ |
